# Supplementary figures and images for: ZNF671 Silencing Affects Signalling Pathways in Head and Neck Cancer via Activation of Oncogenic Non-Coding RNAs
Source: Preprints.org preprint supplement (doi:10.20944/preprints202408.1654.v1), 2024-08-22

Supplementary Figure S1


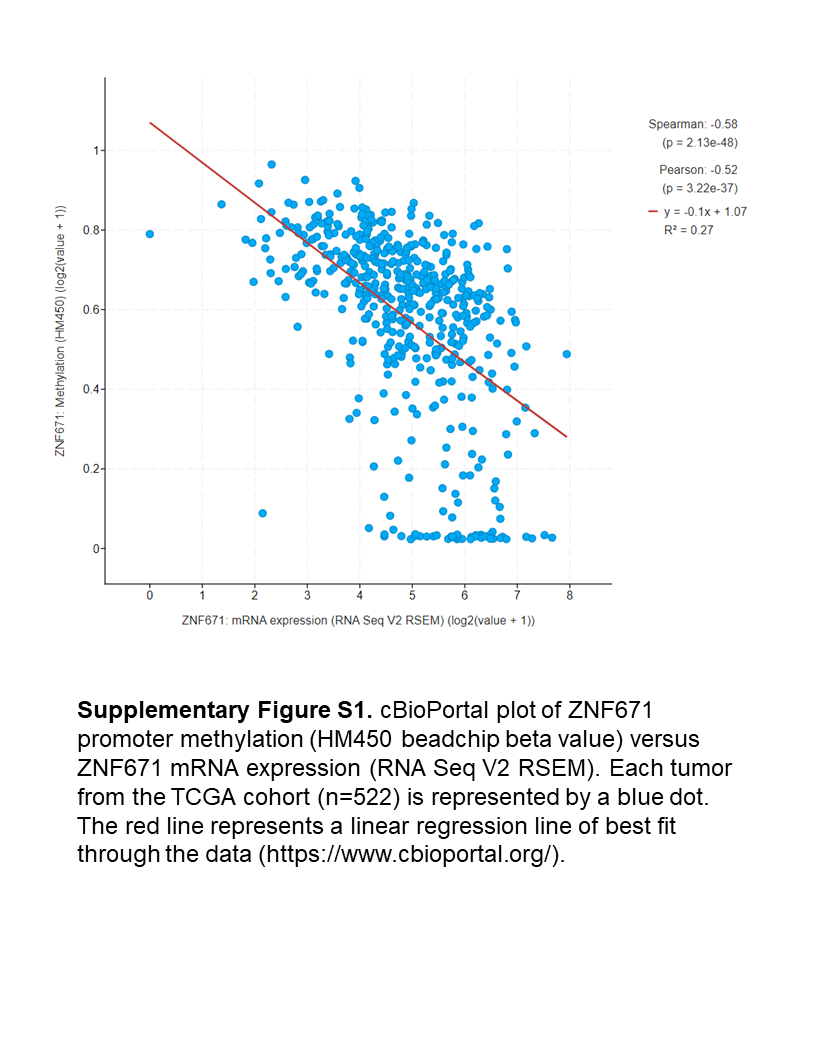


Supplementary Figure S2


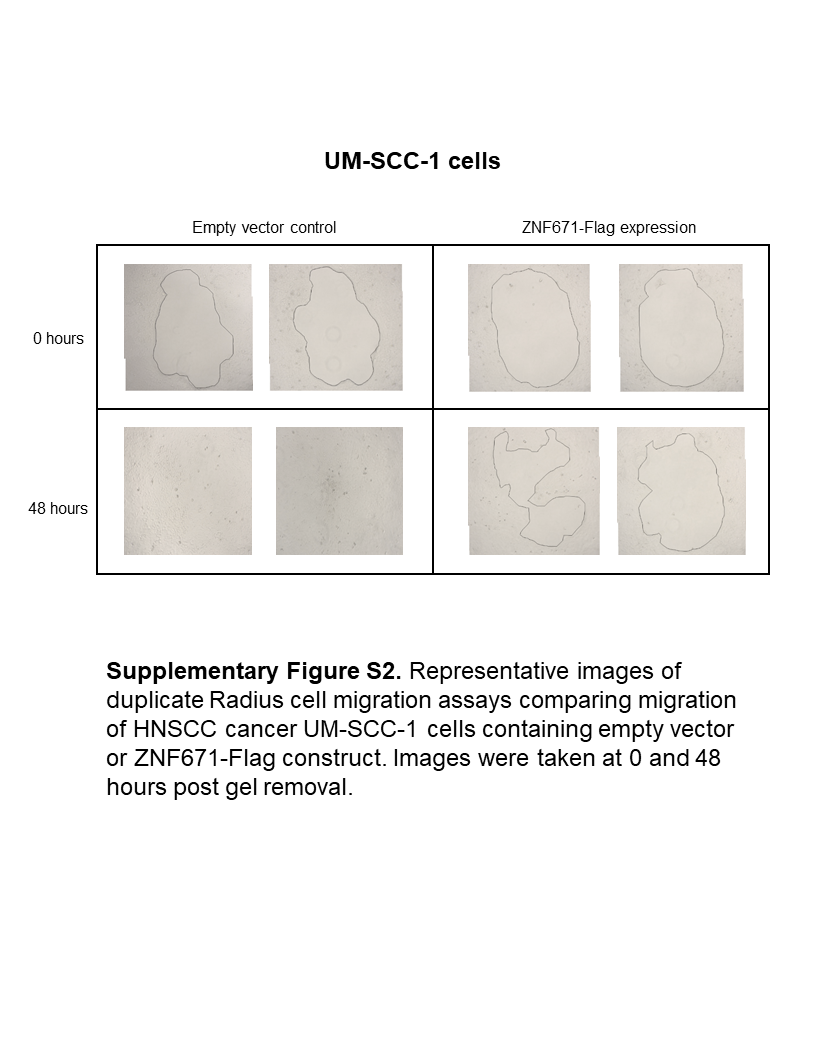


Supplementary Figure S3


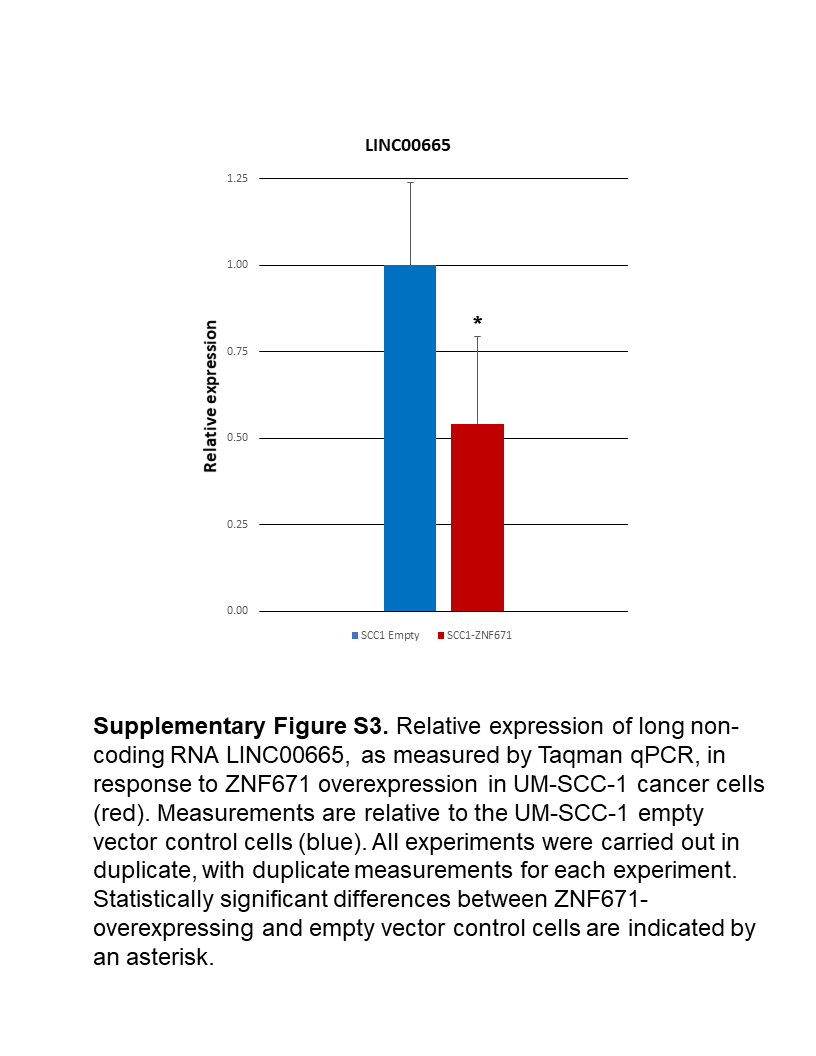

Supplement: Supplementary file 1 [file supplementary]
